# Supplementary material for: Microbial response to deliquescence of nitrate-rich soils in the hyperarid Atacama Desert
Source: Copernicus journal article supplement (doi:10.5194/egusphere-2024-1859), 2024-07-22
Supplement: Supplementary file 1 [file egusphere-2024-1859-supplement.pdf]

# Supplementary material for: "Microbial response to deliquescence of nitrate-rich soil surfaces in the hyperarid Atacama Desert"

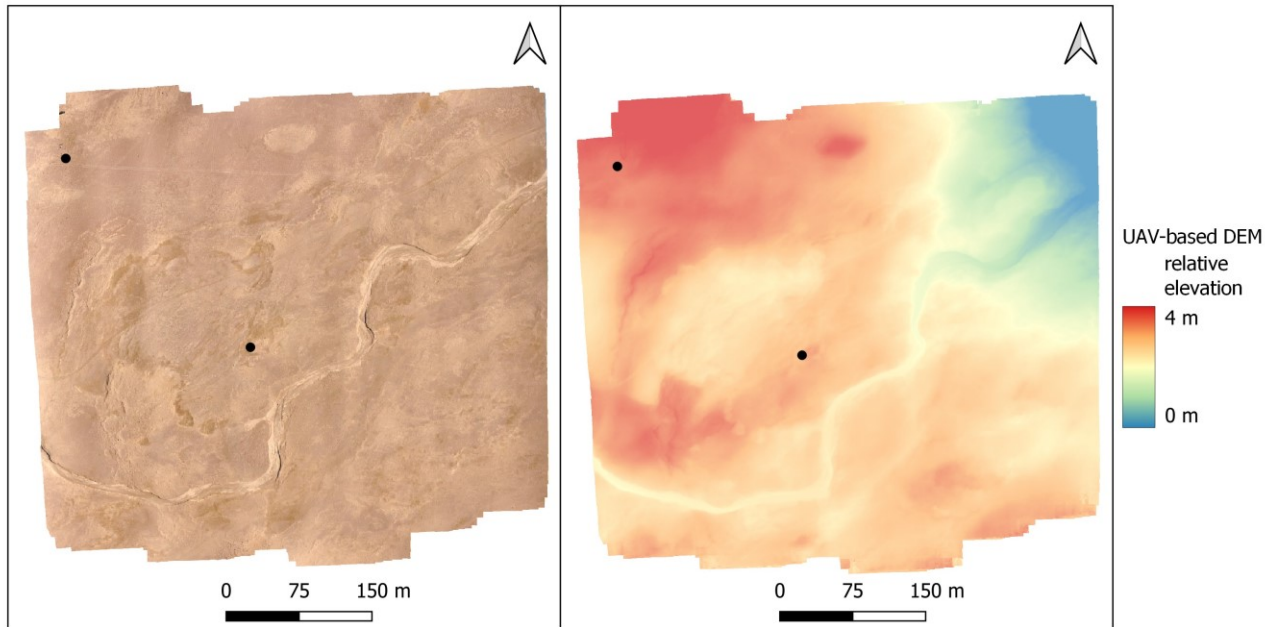

Figure S1: Orthographic image and DEM of the study area of EP1 and EP2

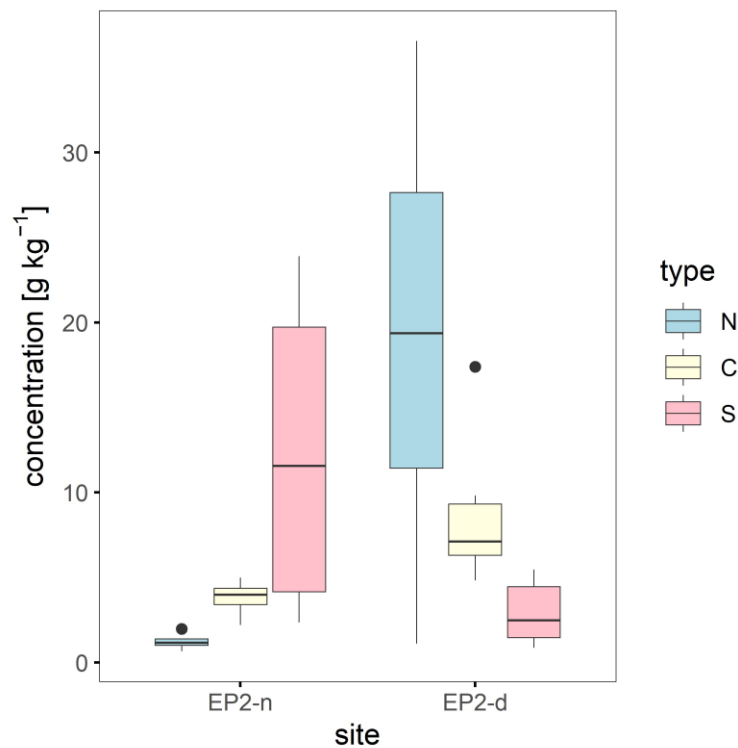

Figure S2: Elemental data (C,N,S) of the EP2 site

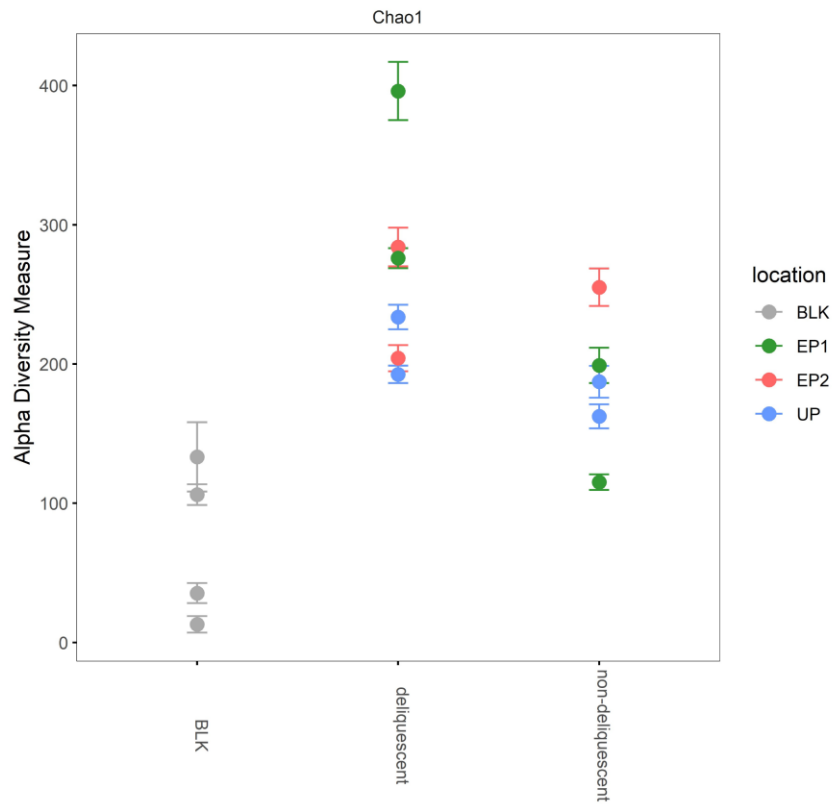

Figure S3: Alpha diversity of the 16S rRNA gene sequencing data

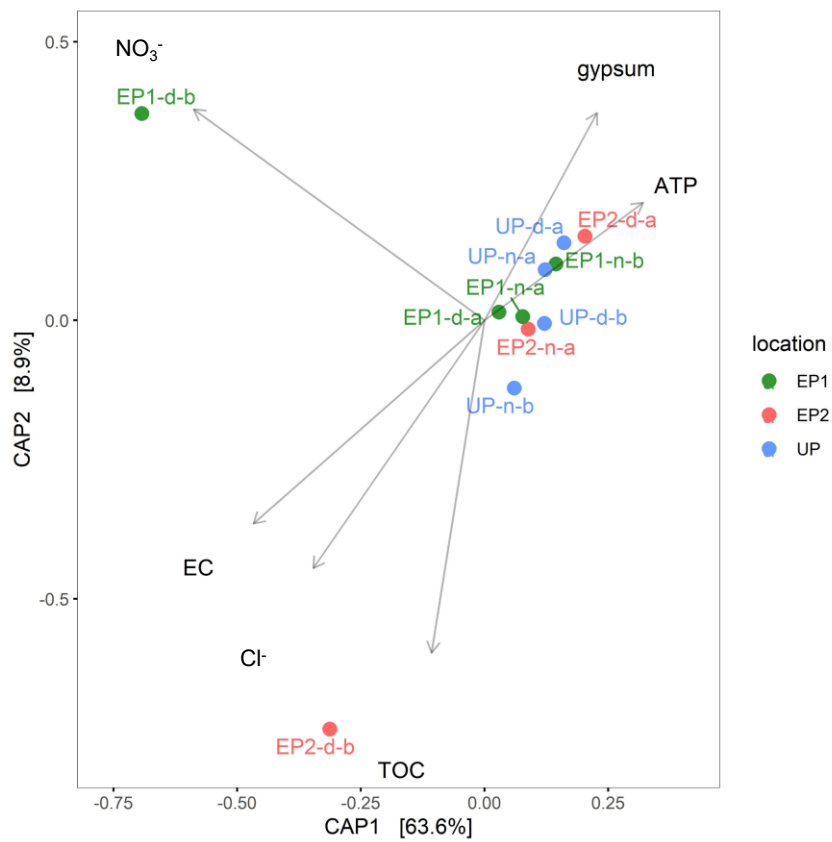

Figure S4: Canonical analysis of Principal Coordinates (CAP) compare the bacterial communities based on 16S rRNA gene sequencing data to different environmental variables (including EC and concentration of gypsum,  $\text{Cl}^-$ ,  $\text{NO}_3^-$ , ATP, and TOC).

## Compositional profiles of organic molecules

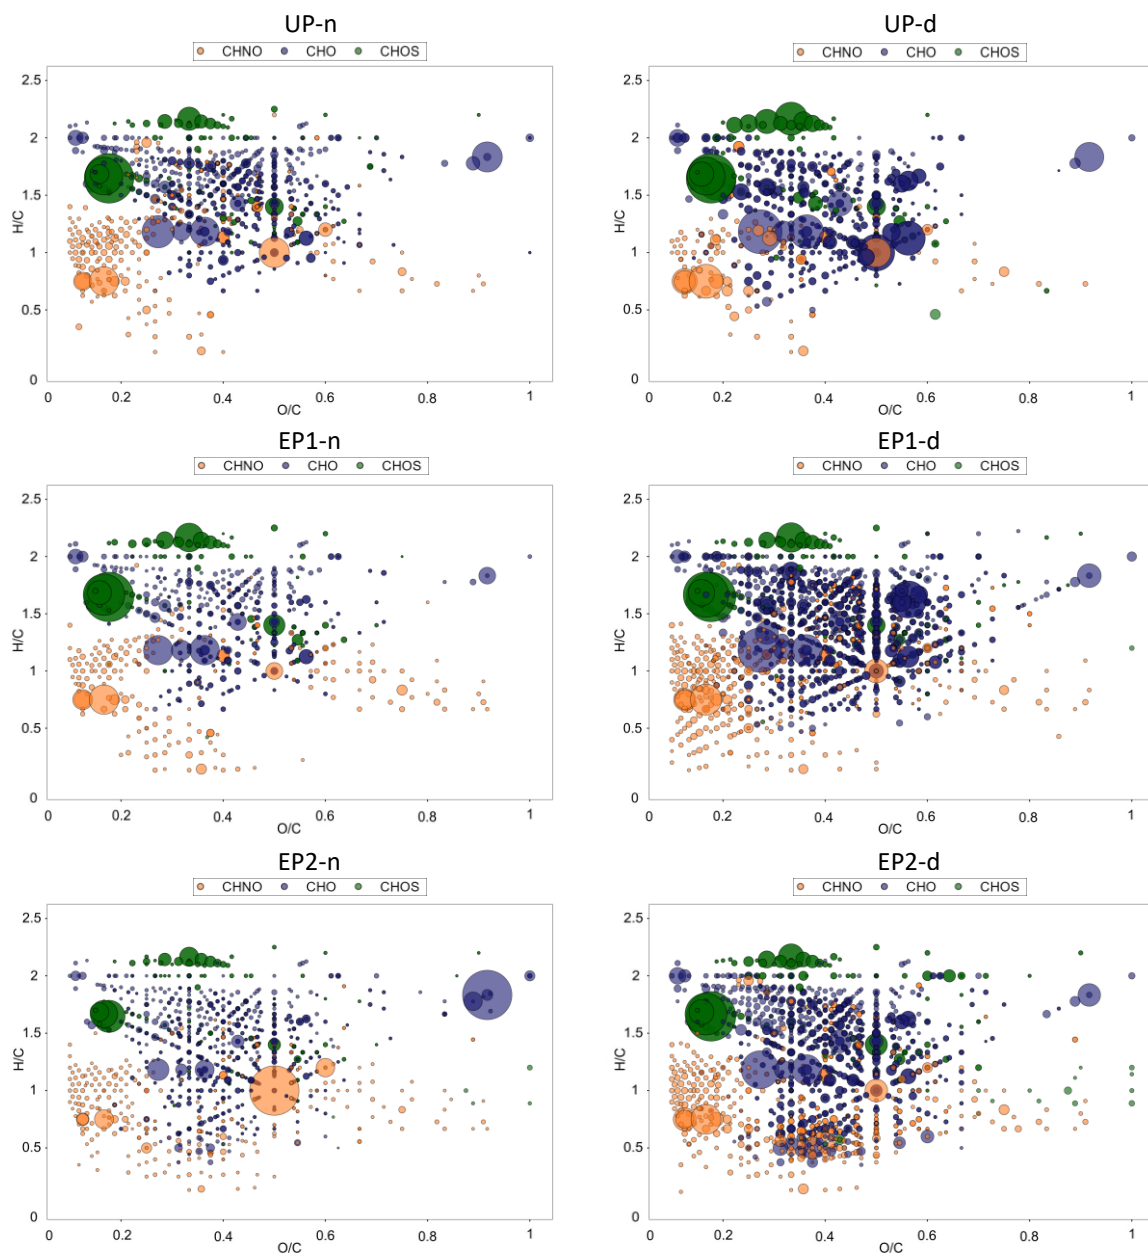

Figure S5: Organic molecule compositional profiles plotted in Van Krevelen diagrams. The hydrogen:carbon atomic ratio (H/C) as a function of the oxygen:carbon (O/C) atomic ratio of organic compounds. The elemental compositions are plotted as CHO (blue), CHOS (green), and CHNO (orange), and bubble sizes depict mass signal intensities.

## tATP quantification via standard addition method

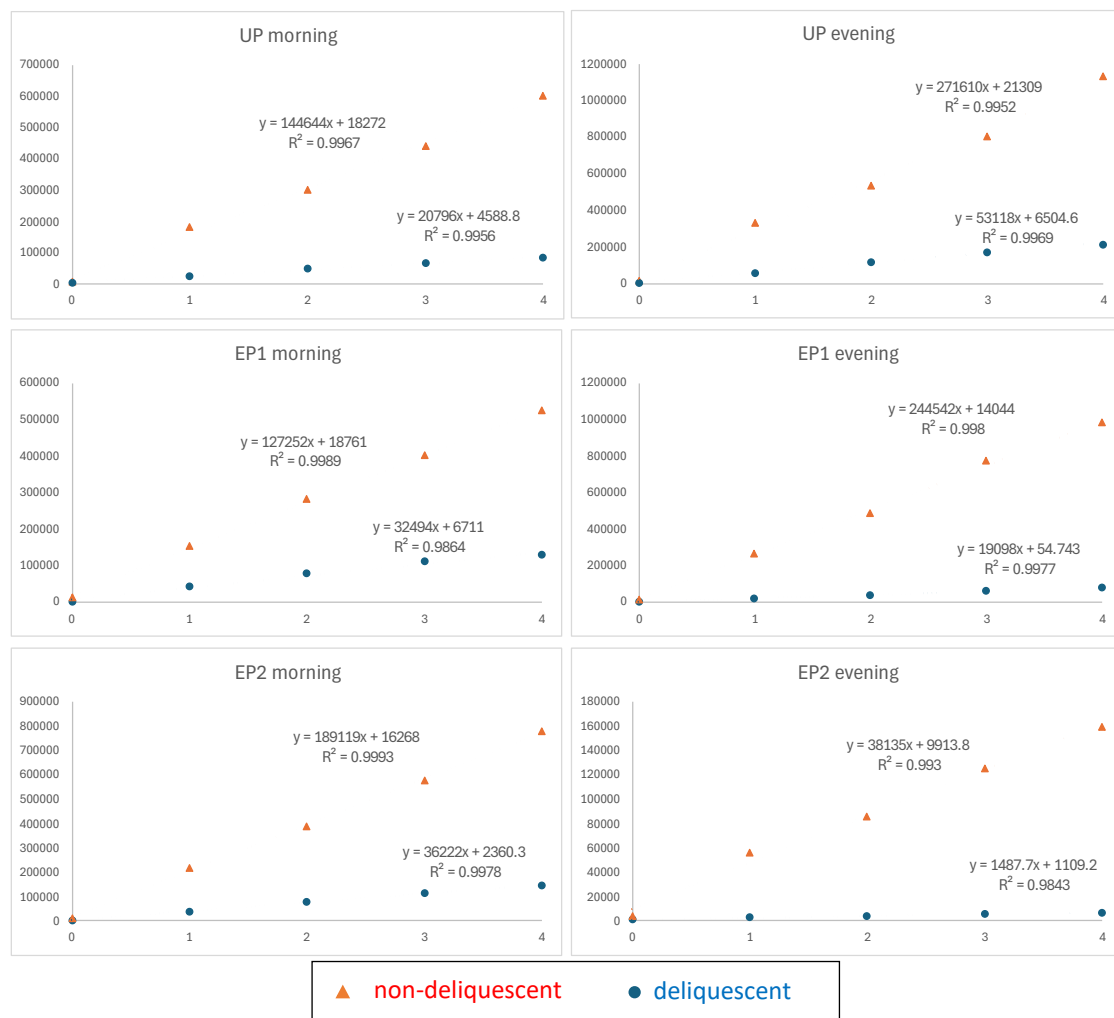

Figure S6: ATP standard addition. Linear fits are plotted for each sample site during morning and evening. y-axis shows the relative light unit (RLU) and the x-axis the standard addition steps in  $\mu\text{L}$ . The linear regression function and the coefficient of determination ( $R^2$ ) are plotted above.

Calculation:

$$c_x = (b * c_{\text{Std}}) / (m * v_x) \text{ in mol/L}$$

where  $c_x$  is the ATP concentration,  $v_x$  the sample volume,  $c_{\text{Std}}$  the concentration of the added standard of the sample.  $b$  is the y-intersection and  $m$  the slope of the linear regression from the measured standard addition 0 - 4  $\mu\text{L}$  1 $\mu\text{M}$  ATP.

Linear regression:  $y = m * x + b$

Table S1 16S rRNA gene sequencing results of the CFUs given in genus level

| Phylum             | Genus          | EP2-d     | EP2-n     | <b>SUM</b> |
|--------------------|----------------|-----------|-----------|------------|
| Proteobacteria     | Pseudomonas    | 6         | 0         | <b>6</b>   |
| Proteobacteria     | Variovorax     | 0         | 3         | <b>3</b>   |
| Proteobacteria     | Agrobacterium  | 4         | 5         | <b>9</b>   |
| Proteobacteria     | Advenella      | 5         | 0         | <b>5</b>   |
| Proteobacteria     | Hydrogenophaga | 0         | 1         | <b>1</b>   |
| Bacillota          | Bacillus       | 0         | 1         | <b>1</b>   |
| Actinomycetota     | Microbacterium | 6         | 0         | <b>6</b>   |
| Proteobacteria     | Rhizobium      | 4         | 0         | <b>4</b>   |
| <i>n sequences</i> |                | <i>25</i> | <i>10</i> | <b>35</b>  |
